# Supplementary material for: Long Noncoding RNA ANRIL Promotes Non–Small Cell Lung Cancer Cell Proliferation and Inhibits Apoptosis by Silencing KLF2 and P21 Expression
Source: Oxford University Press journal article supplement (doi:10.1158/1535-7163.mct-14-0492), 2014-12-12
Supplement: 132950_1_supp_2688095_nds7q2.doc [file 132950_1_supp_2688095_nds7q2.doc]

**Supplementary Table S3** Univariate and multivariate analysis of progression-free survival in NSCLC patients (n=68)

| Variables | Univariate analysis | | | Multivariate analysis | | |
| --- | --- | --- | --- | --- | --- | --- |
|  | HR | 95% CI | p value | HR | 95% CI | p value |
| age | 1.087 | 0.596-1.981 | 0.786 |  |  |  |
| gender | 1.046 | 0.576-1.901 | 0.882 |  |  |  |
| smoker | 1.014 | 0.543-1.893 | 0.965 |  |  |  |
| Histological subtype | 1.082 | 0.598-1.959 | 0.794 |  |  |  |
| Chemotherapy | 0.762 | 0.412-1.409 | 0.387 |  |  |  |
| tumor size | 1.915 | 1.049-3.497 | 0.034* | 1.531 | 0.820-2.862 | 0.182 |
| lymph node metastasis | 0.354 | 0.186-0.672 | 0.001* | 0.468 | 0.240-0.912 | 0.026* |
| TNM stage (I vs. II or IIIa) | 2.068 | 1.369-3.124 | 0. 001* | 1.841 | 1.204-2.814 | 0.005* |
| ANRIL expression | 4.718 | 2.238-9.949 | <0. 001* | 3.509 | 1.619-7.607 | 0.001* |
