# Supplementary material for: Long Noncoding RNA ANRIL Promotes Non–Small Cell Lung Cancer Cell Proliferation and Inhibits Apoptosis by Silencing KLF2 and P21 Expression
Source: Oxford University Press journal article supplement (doi:10.1158/1535-7163.mct-14-0492), 2014-12-12
Supplement: 132950_1_supp_2688096_nds7q2.doc [file 132950_1_supp_2688096_nds7q2.doc]

**Supplementary Table S4** Univariate and multivariate analysis of overall survival in NSCLC patients (n=68)

| Variables | Univariate analysis | | | Multivariate analysis | | |
| --- | --- | --- | --- | --- | --- | --- |
|  | HR | 95% CI | p value | HR | 95% CI | p value |
| age | 1.275 | 0.604-2.693 | 0.524 |  |  |  |
| gender | 1.091 | 0.516-2.307 | 0.820 |  |  |  |
| smoker | 1.252 | 0.586-2.676 | 0.562 |  |  |  |
| Histological subtype | 0.860 | 0.405-1.823 | 0.693 |  |  |  |
| Chemotherapy | 0.452 | 0.192-1.063 | 0.069 |  |  |  |
| tumor size | 1.423 | 0.658-3.077 | 0.370 |  |  |  |
| lymph node metastasis | 0.467 | 0.216-1.000 | 0.050* | 0.601 | 0.269-1.345 | 0.216 |
| TNM stage (I vs. II or IIIa) | 2.014 | 1.227-3.306 | 0. 006* | 1.878 | 1.131-3.120 | 0.015* |
| ANRIL expression | 2.754 | 1.142-6.644 | 0. 024* | 2.223 | 0.877-5.633 | 0.092 |
