# Supplementary material for: Long Noncoding RNA ANRIL Promotes Non–Small Cell Lung Cancer Cell Proliferation and Inhibits Apoptosis by Silencing KLF2 and P21 Expression
Source: Oxford University Press journal article supplement (doi:10.1158/1535-7163.mct-14-0492), 2014-12-12
Supplement: 15357163mct140492-sup-132950_1_supp_2703006_ndhgbw.doc [file 15357163mct140492-sup-132950_1_supp_2703006_ndhgbw.doc]

**Supplementary Fig.S1. The effect of ANRIL on cells proliferation and migration.** (A) Array comparative genomic hybridization reveals DNA copy number gain or loss in chromosomal region of ANRIL. Each green dot represents a probe in Agilent Human Genome CGH Microarray 244A. The chromosomal coordinate is represented on the x axis. Copy number alteration statuses were determined based on GLAD copy number values: gain (<3) and loss (>1.25). (B) MTT assays were used to determine the cell viability for si-ANRIL-transfected A549 cells. Values represented the mean ± s.d. (C) MTT assays were used to determine the cell viability for pCNS-ANRIL-transfected 16HBE cells. (D) Transwell assays were used to determine the cell migration ability for si-ANRIL-transfected PC9 and SPCA1 cells. (E)The levels of p15 and p16 mRNA were determined by qPCR when SPCA1 and H1299 cells transfected with si-ANRIL. Values represent the mean ± s.d. from three independent experiments. *P < 0.05 and **P < 0.01
